# Supplementary material for: Amelioration of obesity-related biomarkers by Lactobacillus sakei CJLS03 in a high-fat diet-induced obese murine model
Source: PubMed Central journal article supplement (PMC6497927; doi:10.1038/s41598-019-43092-y), 2019-05-02
Supplement: 41598_2019_43092_MOESM1_ESM.pdf [file 41598_2019_43092_MOESM1_ESM.pdf]

## Supplementary information

### **Amelioration of obesity-related features by *Lactobacillus sakei* CJLS03 in a high-fat diet-induced obese murine model**

Yosep Ji<sup>1</sup>, Soyoung Park<sup>1</sup>, Youngmee Chung<sup>2</sup>, Bobae Kim<sup>1,4</sup>, Haryung Park<sup>1</sup>, Eunchong Huang<sup>1</sup>, Dahye Jeong<sup>2</sup>, Hoe-Yune Jung<sup>3</sup>, Bongjoon Kim<sup>2</sup>, Chang-Kee Hyun<sup>1,4</sup>, Wilhelm H. Holzapfel<sup>1\*</sup>

<sup>1</sup>Advanced Green Energy and Environment, Handong Global University, Pohang, Gyungbuk 37554, Republic of Korea;

<sup>2</sup>CJ Blossom Park, 42, Gwanggyo-ro, Yeongtong-gu, Suwon-si, Gyeonggi-do, 16495, Republic of Korea;

<sup>3</sup>Department of Life Science, Division of Integrative Biosciences and Biotechnology, POSTECH, Pohang, Gyungbuk 37673, Republic of Korea;

<sup>4</sup>School of Life Sciences, Handong Global University, Pohang, Gyungbuk 37554, Republic of Korea

\*Correspondence and requests for materials should be addressed to W.H.H. (email: [wilhelm@woodapple.net](mailto:wilhelm@woodapple.net))

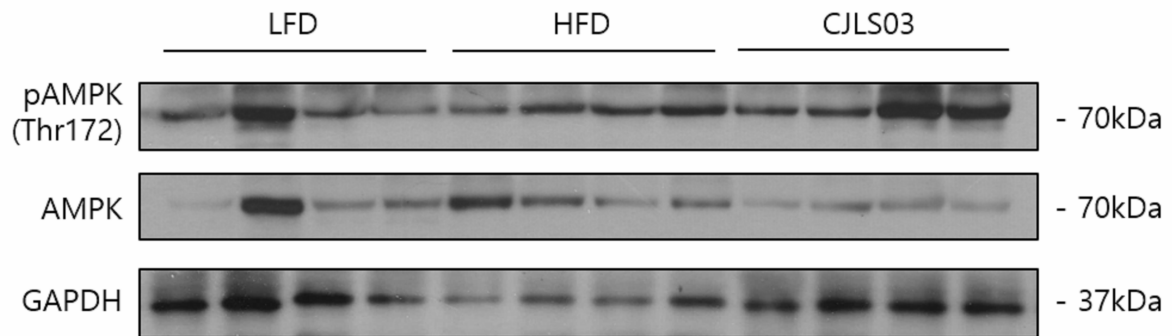

**Supplementary Figure S1.** Western blot of 5' AMP-activated protein kinase (AMPK) and phosphorylated AMPK $\alpha$  (Thr 172) as host obesity and immune associated biomarkers in epididymal adipose tissue after *L. sakei* CJLP03 application in the diet-induced obese murine model. For explanation of treatment and abbreviations, see Table 1.

**Supplementary Table 1.** Composition of high-fat and low-fat (control) diets.

|                     | High-fat diet<br>(5.24 kcal/g) |        | Control diet<br>(3.85 kcal/g) |        |
|---------------------|--------------------------------|--------|-------------------------------|--------|
|                     | g %                            | kcal % | g %                           | kcal % |
| Protein             | 26.2                           | 20     | 19.2                          | 20     |
| Carbohydrate        | 26.3                           | 20s    | 67.3                          | 70     |
| Fat                 | 34.9                           | 60     | 4.3                           | 10     |
|                     | g                              | kcal   | g                             | kcal   |
| Casein 80-mesh      | 200                            | 800    | 200                           | 800    |
| L-Cystine           | 3                              | 12     | 3                             | 12     |
| Cornstarch          | 0                              | 0      | 315                           | 1260   |
| Maltodextrin 10     | 125                            | 500    | 35                            | 140    |
| Sucrose             | 68.8                           | 275.2  | 350                           | 1400   |
| Cellulose BW200     | 50                             | 0      | 50                            | 0      |
| Soybean oil         | 25                             | 225    | 25                            | 225    |
| Lard                | 245                            | 2205   | 20                            | 180    |
| Mineral mix S10026  | 10                             | 0      | 10                            | 0      |
| Dicalcium phosphate | 13                             | 0      | 13                            | 0      |
| Calcium carbonate   | 5.5                            | 0      | 5.5                           | 0      |
| Potassium citrate   | 16.5                           | 0      | 16.5                          | 0      |
| Vitamin mix V10001  | 10                             | 40     | 10                            | 40     |
| Choline bitartrate  | 2                              | 0      | 2                             | 0      |
| FD and C dye        | 0.05                           | 0      | 0.05                          | 0      |
